# Supplementary material
Source: PubMed Central journal article supplement (PMC3118735)

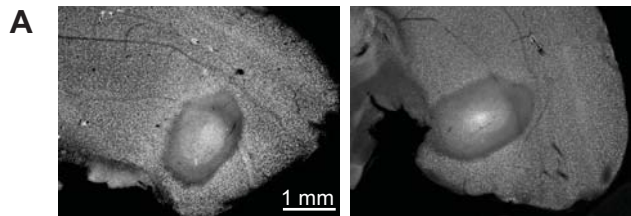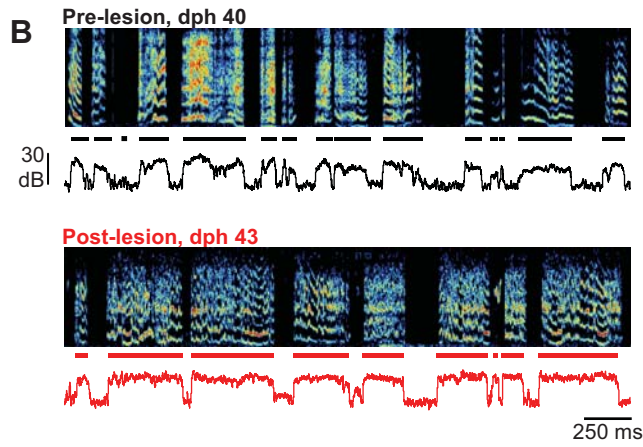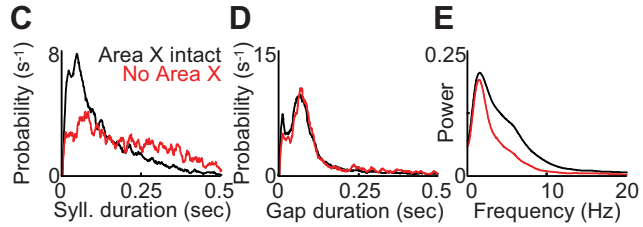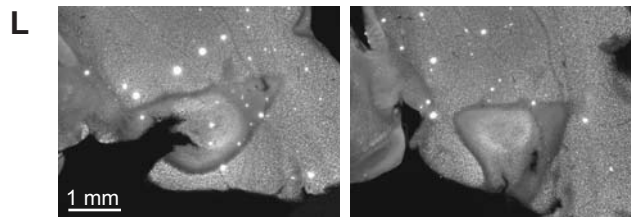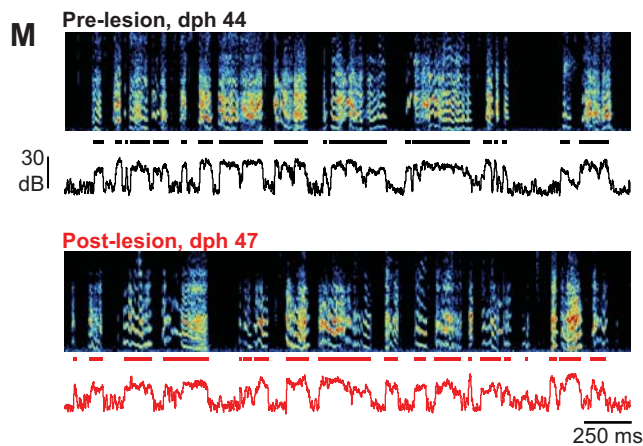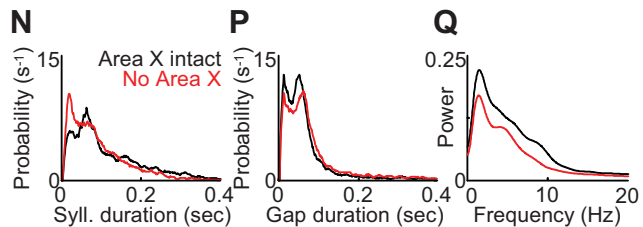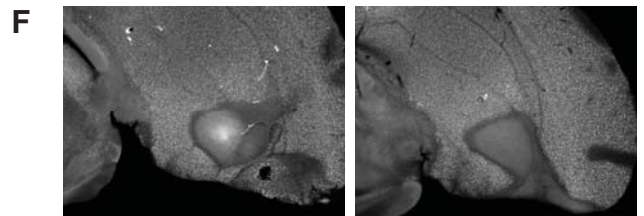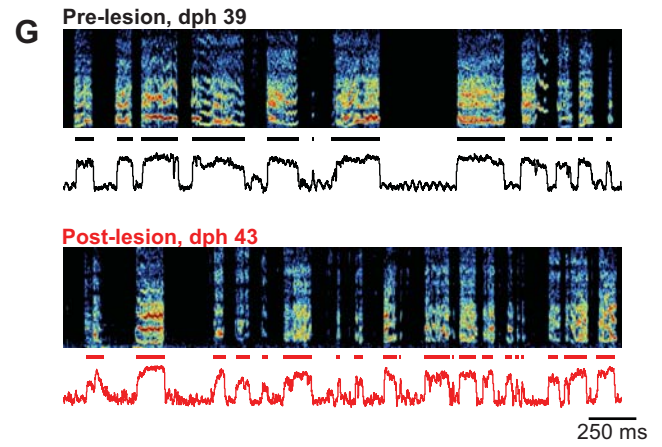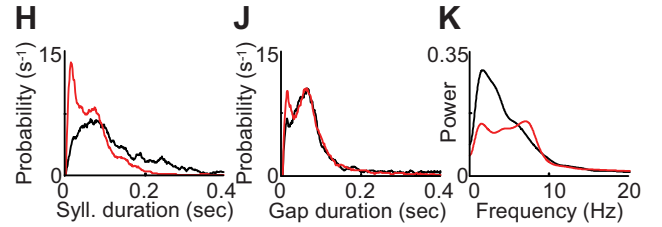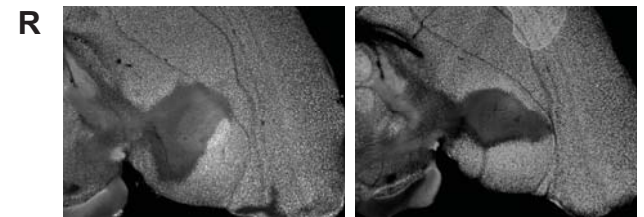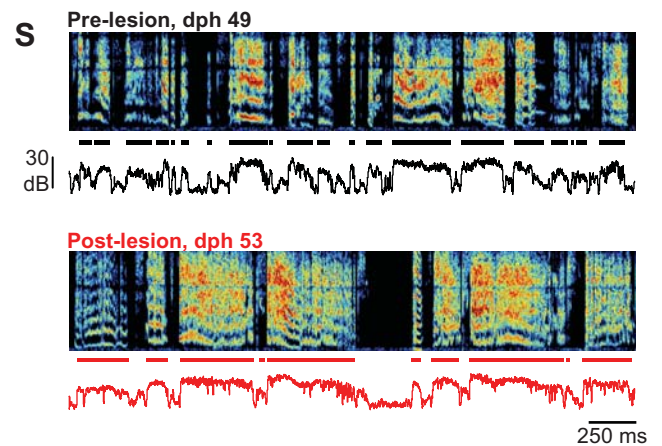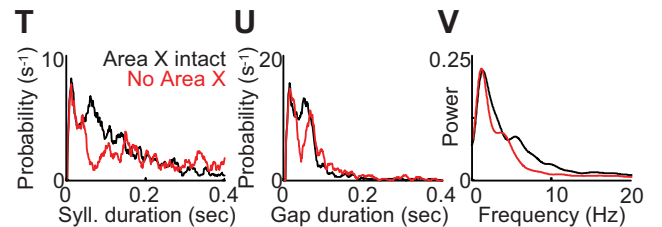

**Supplemental figure 1**

## DLM Lesions

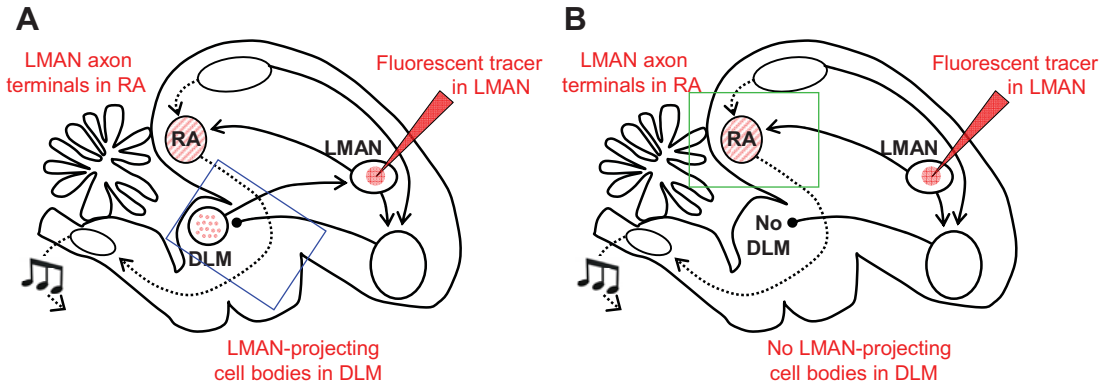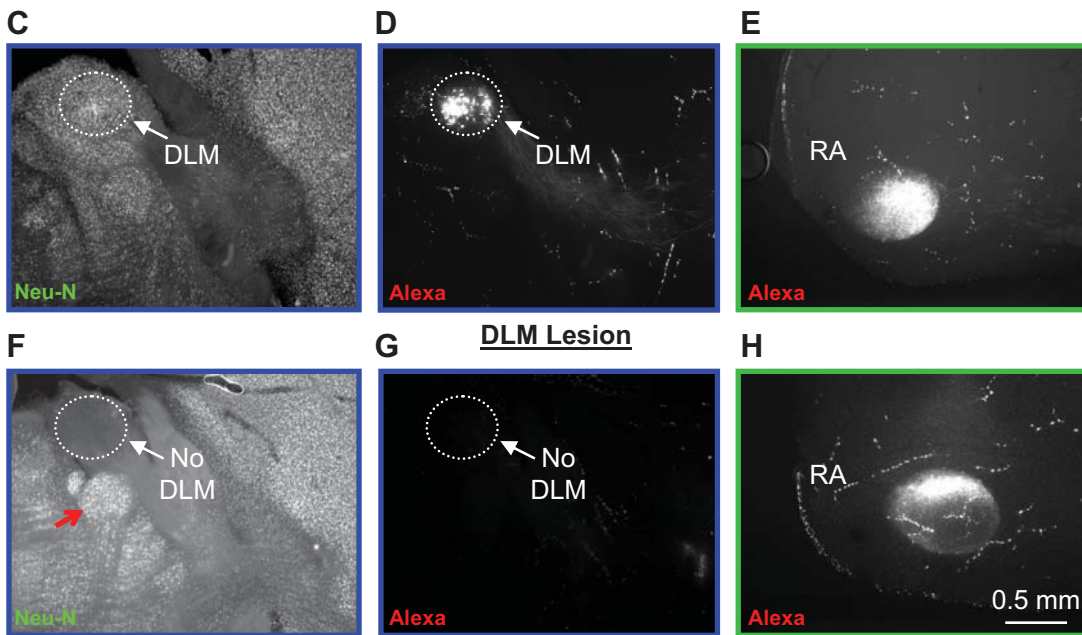

## HVC lesions

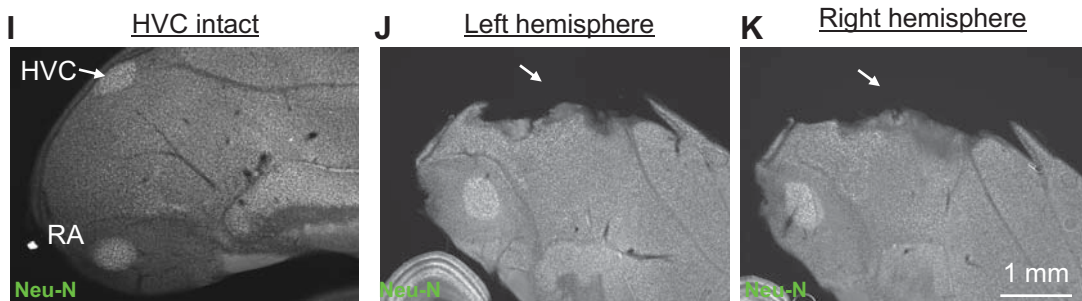

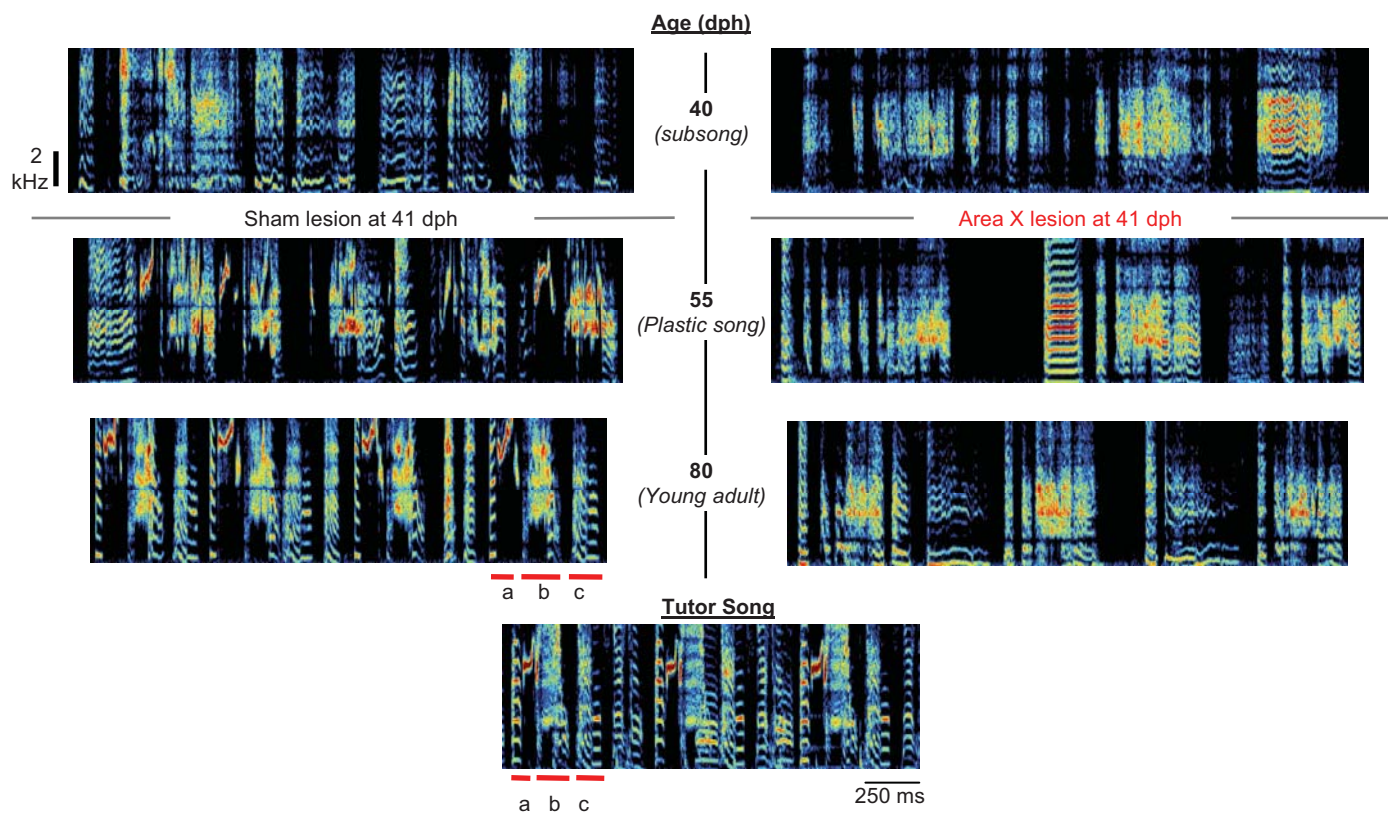

Supplemental figure 3

Supplement: supp_00823.2010_figs.pdf [file supp_00823.2010_figs.pdf]
